# Supplementary material for: Storage Primes Erythrocytes for Necroptosis and Clearance
Source: PubMed Central journal article supplement — Cell Physiol Biochem. Author manuscript; Available in PMC 2023 Feb 3. (PMC9897227; doi:10.33594/000000153), 2019
Supplement: NIHMS1067974-supplement-Supplemental_Material.pdf [file NIHMS1067974-supplement-Supplemental_Material.pdf]

# Supplemental Material

## Storage Primes Erythrocytes for Necroptosis and Clearance

William D. McCaig<sup>a</sup> Alexa L. Hodges<sup>a</sup> Matthew A. Deragon<sup>a</sup>  
Robert J. Haluska Jr<sup>a</sup> Sheila Bandyopadhyay<sup>b</sup> Adam J. Ratner<sup>c</sup>  
Steven L. Spitalnik<sup>b</sup> Eldad A. Hod<sup>b</sup> Timothy J. LaRocca<sup>a</sup>

<sup>a</sup>Department of Basic and Clinical Sciences, Albany College of Pharmacy and Health Sciences, Albany, NY, USA, <sup>b</sup>Department of Pathology and Cell Biology, Columbia University Medical Center, New York, NY, USA, <sup>c</sup>Department of Pediatrics and Microbiology, New York University School of Medicine, New York, NY, USA

Fig. S1

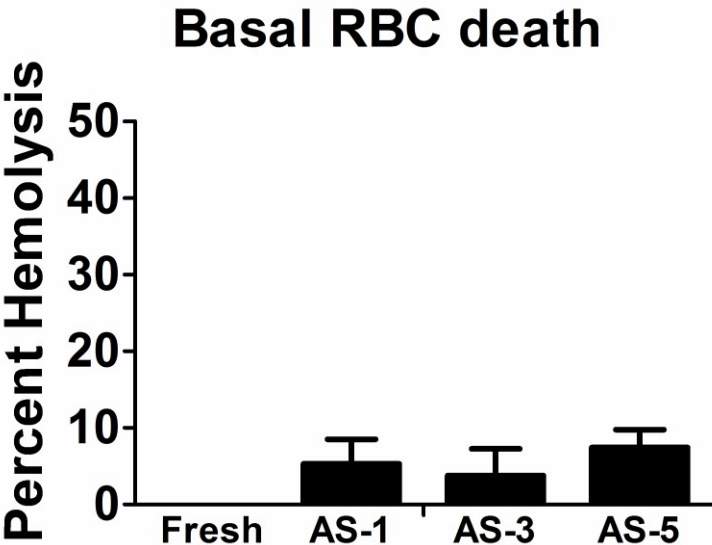

**Figure S1: RBC storage leads to <10% hemolysis in the absence of toxin treatment.** Fresh human RBCs or those stored in AS-1, AS-3, or AS-5 for 1 week at 4°C were analyzed for hemolysis. Storage in these solutions causes <10% hemolysis.
